# Supplementary material for: Decadal trends (2013–2023) in PM10 sources and oxidative potential at a European urban supersite (Alpine Valley, Grenoble, France)
Source: Copernicus journal article supplement (doi:10.5194/egusphere-2025-2933), 2025-07-01
Supplement: Supplementary file 1 [file egusphere-2025-2933-supplement.pdf]

## Decadal trends (2013–2023) in PM<sub>10</sub> sources and oxidative potential at a European urban supersite (Alpine Valley, Grenoble, France)

Vy Ngoc Thuy Dinh<sup>1</sup>, Jean-Luc Jaffrezo<sup>1</sup>, Pamela A. Dominutti<sup>1</sup>, Rhabira Elazzouzi<sup>1</sup>, Sophie Darfeuill<sup>1</sup>, Céline Voiron<sup>1</sup>, Anouk Marsal<sup>1</sup>, Stéphane Socquet<sup>2</sup>, Gladys Mary<sup>2</sup>, Julie Cozic<sup>2</sup>, Catherine Coulaud<sup>1</sup>, Marc Durif<sup>3,4</sup>, Olivier Favez<sup>3,4</sup>, Gaëlle Uzu<sup>1</sup>

<sup>1</sup> Université Grenoble Alpes, CNRS, IRD, INP-G, INRAE, IGE (UMR 5001), 38000 Grenoble, France

<sup>2</sup> Atmo Auvergne-Rhône-Alpes (Atmo AuRA), 69500 Bron, France

<sup>3</sup> INERIS, Parc Technologique Alata, BP 2, 60550 Verneuil-en-Halatte, France

<sup>4</sup> Laboratoire central de surveillance de la qualité de l'air (LCSQA), 60550 Verneuil-en-Halatte, France

Correspondence to: Gaëlle Uzu [gaëlle.uzu@univ-grenoble-alpes.fr](mailto:gaëlle.uzu@univ-grenoble-alpes.fr)

### S1. Multivariate imputation by chained equations (MICE)

Multivariate imputation by chained equations (MICE) is a flexible algorithm that could be combined with other statistical techniques for estimating missing values by using observed data (by performing the linear, multilinear regression or calculation of the mean/median to fill the missing) (Azur et al., 2011). The MICE algorithm employs multiple regression models, where each missing value is conditionally modeled based on the observed (non-missing) values. This imputation process provides a more complete database for PMF analysis, contributing to a reduction in recommendation errors in the results (Ocepek et al., 2015).

Here, the data preparation and imputation processes were implemented through 4 main steps. First, all missing values of each metal are replaced by the mean of its concentration, these replaced values are marked as "place-holders". Second step, the metal that has the fewest missing values was chosen, and the "place-holder" is put back to missing (called Px). In the third step, a multiple linear regression is applied, with the chosen metal set as a criterion and the other variables are predictors. Fourth step, the missing value Px is calculated by using the slope and intercepts of multiple linear regression in the third step. The processes between the second and the fourth steps are repeated until all "place-holders" are replaced by the regression prediction value; this repeated run is called the "cycle" of imputation. The imputation cycle is iterative implemented until the difference between the 2 last cycles is minimized. MICE was implemented in Python 3.9 using the package "*scikit-learn 1.2.0*" (Pedregosa et al., 2011).

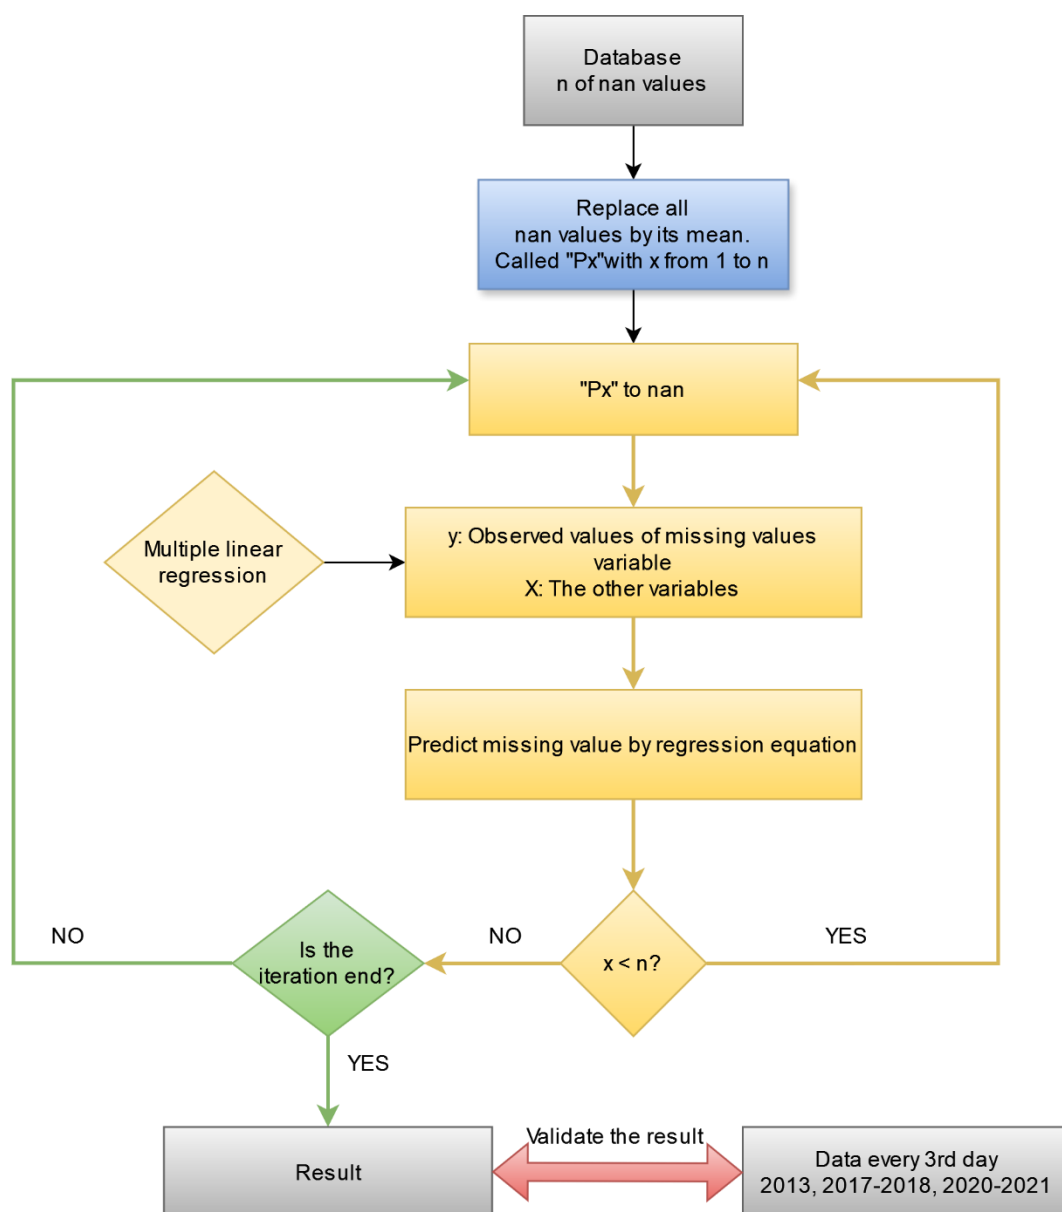

Figure S.1. Workflow of the MICE algorithm

Table S 1. R<sup>2</sup> between imputed and measured metals

|           | 2013 | 2017-2018 | 2020-2021 |
|-----------|------|-----------|-----------|
| <b>As</b> | 0.43 | 0.6       | 0.2       |
| <b>Cd</b> | 0.41 | 0.55      | 0.1       |
| <b>Cr</b> | 0.32 | 0.34      | 0.38      |
| <b>Cu</b> | 0.63 | 0.4       | 0.42      |
| <b>Mn</b> | 0.33 | 0.35      | 0.5       |
| <b>Ni</b> | 0.14 | 0.33      | 0.14      |
| <b>Pb</b> | 0.33 | 0.31      | 0.15      |
| <b>Sb</b> | 0.37 | 0.50      | 0.2       |
| <b>V</b>  | 0.41 | 0.27      | 0.52      |
| <b>Zn</b> | 0.26 | 0.35      | 0.20      |

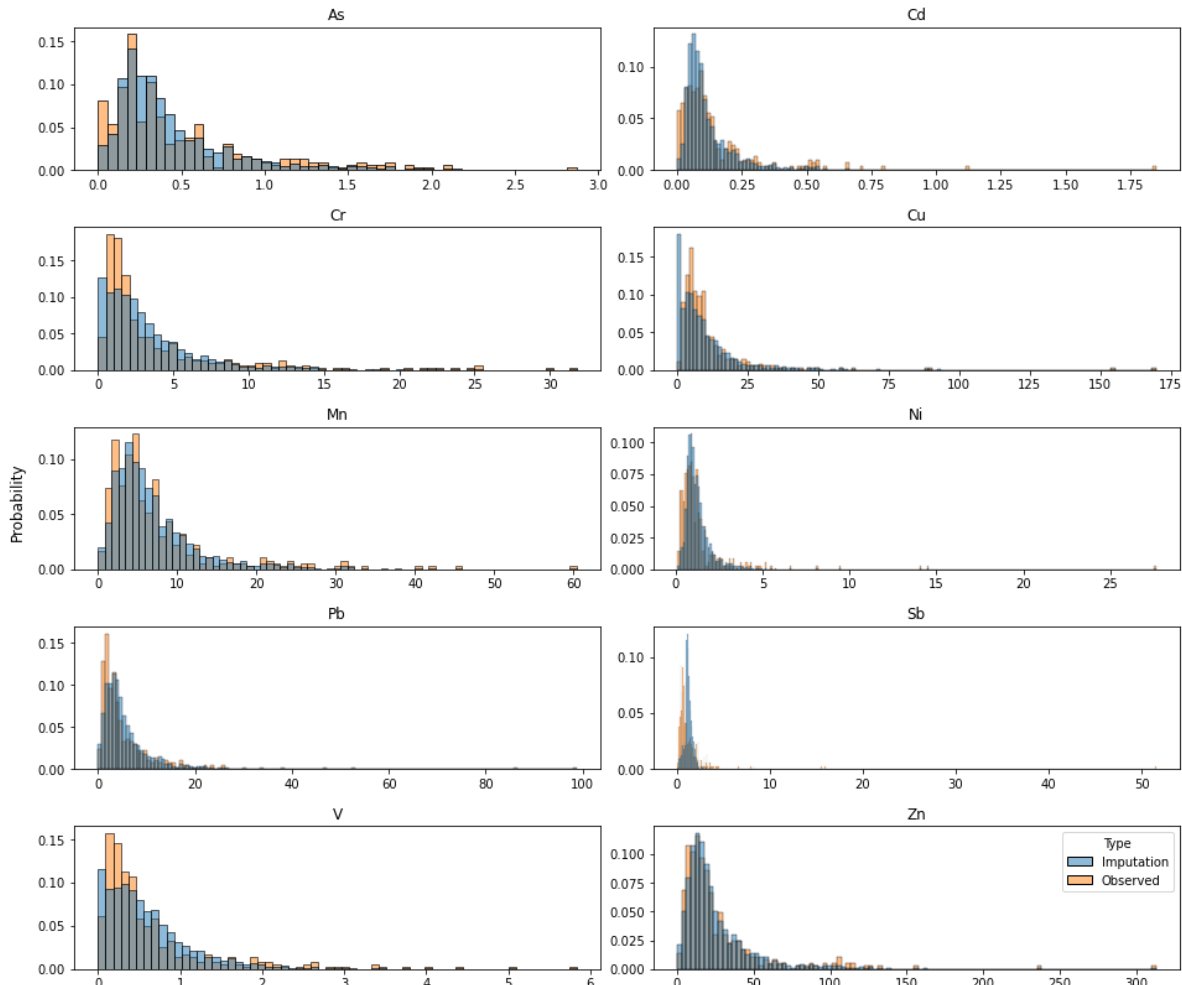

**Figure S.2. Distribution of measured and imputed metals**

## S2. Some equations

PMF equation:

$$X_{ij} = \sum_{k=1}^p G_{ik} * F_{kj} + E_{ij} \text{ (Eq. (S1))}$$

$$G_{ik} \geq 0, F_{ik} \geq 0 \text{ (Eq. (S2))}$$

Where X is a (i × j) matrix of j chemical species in measured period i (daily) into p factors with a matrix (i × k) representing the source contribution (G) and a matrix (k × j) representing the factor composition (F). E is the residuals for each species. All the factor matrices G and F elements are constrained to be non-negative.

Variance Inflation Factor (VIF) represent the collinearity between the PM sources, which is calculated:

$$VIF_i = \frac{1}{1 - R_i^2}, i = 1, \dots, p - 1 \text{ (Eq. (S3))}$$

Chemical Mass Closure:

$$PM_{10} \approx EC + OM + [\text{sea salt}] + [\text{nss-SO}_4^{2-}] + [\text{dust}] + [\text{non dust}]$$

with:  
 $[OM] = [OC] \times 1.8$  (Favez et al., 2010)  
 $[sea\ salt] = [Na^+] \times 1.47 + [Cl^-]$  (Putaud et al., 2010)  
 $[nss-SO_4^{2-}] = [SO_4^{2-}] - [Na^+] \times 0.252$  (Alexander et al., 2005)  
 $[dust] = 5.6 \times ([Ca^{2+}] - [Na^+]/26)$  (Putaud et al., 2004)  
 $[non\ dust] = [Cu] + [Pb] + [V] + [Zn]$  (Salameh et al., 2015)

### S3. PMF input matrices

The basic chemical species to be included in the input matrices are key components for the mass balance of the PM: organic carbon (OC), element carbon (EC), major ions (nitrate, sulfate, ammonium), sea salt species (Na, Cl, Mg), and mineral dust (Al, Fe, Ti). Then the input matrices should include a set of chemical tracers that allows the discrimination of their sources. This list is very variable according to the analytical capabilities used in the research program.

In order to avoid double counting of carbon mass in OC and in organic tracers added to the input data (ie levoglucosan, mannosan, MSA, polyols in the classic PMF at IGE), we calculate a variable OC\* by:

$$[OC^*] = [OC] - [\text{total mass C of organic tracers in PMF}]$$

### Uncertainties of measured data

A table of the uncertainties of each daily data for each chemical species should be constructed. Several ways for their calculations exist. Here, we are using the formula described in the table below, resulting from all the work developed in the SOURCE program and the post-doc work of D Salameh (published in Weber et al., 2019).

**Table S 2. Formula to calculate uncertainties**

| Specie                              | Calculation by                        | Formula                                                                          |
|-------------------------------------|---------------------------------------|----------------------------------------------------------------------------------|
| OC*, EC, PM10                       | Fixed percentage                      | 10%                                                                              |
| Specie which has concentration < QL | Ratio of QL<br>Polissar et al. (1998) | $\frac{5 \times QL}{6}$                                                          |
| Imputed metals                      | Gianini et al., 2012                  | $\sigma_{ij} = 2 * \sqrt{QL_j^2 + (CV_j \times x_{ij})^2 + (a \times x_{ij})^2}$ |
| The others                          | Gianini et al., 2012                  | $\sigma_{ij} = \sqrt{QL_j^2 + (CV_j \times x_{ij})^2 + (a \times x_{ij})^2}$     |

With:

- QL : Quantification limit.
- CV : Coefficient of variation.
- a: Additional coefficient of variation
- x: Species concentration.

### S4. PMF criteria for validation and applied constraint

According to the European guide on air pollution source apportionment with receptor models (Belis et al., 2014), the validation criteria of a PMF solution include:

- (1) Evolution of  $Q_{\text{true}}/Q_{\text{robust}} < 1.5$ : Indicate that the good result should not have more than 30% data outliers. Generally, the final solution presents a much lower ratio.
- (2) The chemical profile is clear: the concentration and percentage of trace species in the profile and the temporal variability should be clear enough to identify a source.
- (3) All factors should have a contribution  $> 1\%$  to the total variable (PM10): to avoid a case where there is a source, but it has almost no impact on the study area.
- (4) The distribution of residuals: the distribution of residuals (differences between input data and reconstructed data) is from -3 to 3, if there is any value is out of this range, that means that the reconstruction is not valid or that there are outliers.
- (5) Evaluate the species reconstruction: The correlation coefficient between measured and predicted concentrations must be greater than 0.5.
- (6) Bootstrap test: it indicates the stability of the solution: at least 70 runs per 100 runs for all factors where the correlation between the base run and boot runs is greater than 0.6.

**Table S 3. The constraints applied for PMF**

| Factor           | Element      | Type              | Value   |
|------------------|--------------|-------------------|---------|
| Industrial       | Levoglucosan | Set to Zero       | 0       |
| Industrial       | Mannosan     | Set to Zero       | 0       |
| Industrial       | PM10         | Define Limits     | 0.1/0.4 |
| MSA rich         | MSA          | Pull Up Maximally | NA      |
| MSA rich         | Polyols      | Set to Zero       | 0       |
| Biomass burning  | Levoglucosan | Pull Up Maximally | NA      |
| Biomass burning  | Mannosan     | Pull Up Maximally | NA      |
| Primary biogenic | Polyols      | Pull Up Maximally | NA      |
| Primary traffic  | Ba           | Pull Up Maximally | NA      |
| Primary traffic  | Cu           | Pull Up Maximally | NA      |
| Primary traffic  | OC*/EC       | Ratio             | 0.44    |
| Primary traffic  | Cu/Sb        | Ratio             | 12.6    |
| Primary traffic  | Cu/Mn        | Ratio             | 5.7     |

## S5. PMF results

**Table S 4.  $Q_{\text{true}}/Q_{\text{robust}}$  values**

|                | 10 yeas | 2013-2016 | 2017-2020 | 2021-2023 |
|----------------|---------|-----------|-----------|-----------|
| Base run       | 1.07    | 1.05      | 1.05      | 1.1       |
| Constraint run | 1.07    | 1.06      | 1.05      | 1.1       |

100

Table S 5. Bootstrap value before and after constraint

|                  | 10 years |            | 2013-2016 |            | 2017-2020 |            | 2021-2023 |            |
|------------------|----------|------------|-----------|------------|-----------|------------|-----------|------------|
|                  | Base     | Constraint | Base      | Constraint | Base      | Constraint | Base      | Constraint |
| Aged sea salt    | 100      | 100        | 100       | 100        | 100       | 100        | 100       | 100        |
| Biomass burning  | 100      | 100        | 100       | 100        | 100       | 100        | 100       | 100        |
| Industrial       | 100      | 100        | 100       | 100        | 100       | 100        | 100       | 100        |
| MSA rich         | 100      | 100        | 97        | 100        | 100       | 100        | 93        | 100        |
| Mineral dust     | 100      | 100        | 93        | 100        | 98        | 100        | 85        | 100        |
| Nitrate rich     | 100      | 100        | 100       | 100        | 100       | 100        | 100       | 100        |
| Primary biogenic | 100      | 100        | 100       | 100        | 100       | 100        | 100       | 100        |
| Primary traffic  | 80       | 98         | 82        | 96         | 93        | 100        | 70        | 88         |
| Chloride rich    | 98       | 100        | 99        | 100        | 92        | 100        | 99        | 100        |
| Sulfate rich     | 100      | 100        | 87        | 99         | 98        | 100        | 96        | 95         |

101

102

Table S 6. R2 between observed and predicted by PMF of PM concentration

|                | 10 years | 2013-2016 | 2017-2020 | 2021-2023 |
|----------------|----------|-----------|-----------|-----------|
| Base run       | 0.97     | 0.98      | 0.97      | 0.98      |
| Constraint run | 0.97     | 0.98      | 0.97      | 0.98      |

103

104

Displacement run: No warning for unstable or un-useable solution for PMF performed on 10-years dataset and every 3 years datasets.

105

106

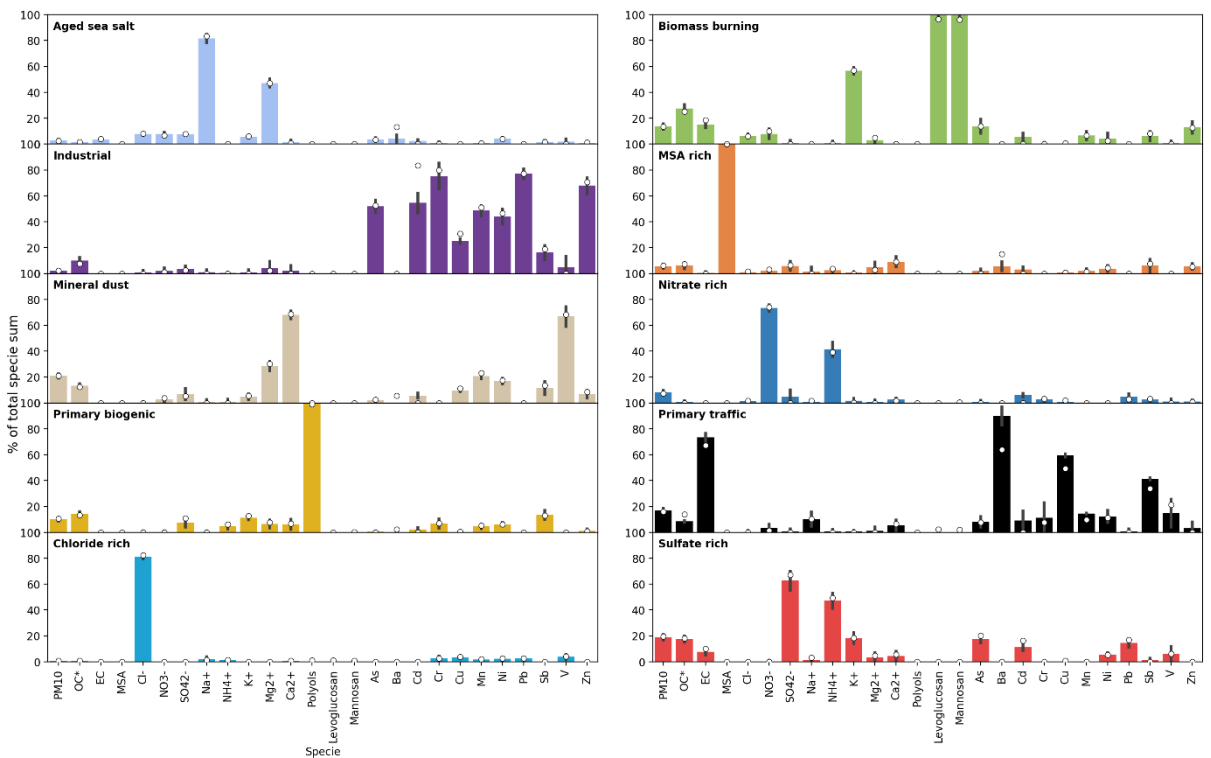

107

108

Figure S.3. Chemical profiles of PM<sub>10</sub> sources, solution 10-year

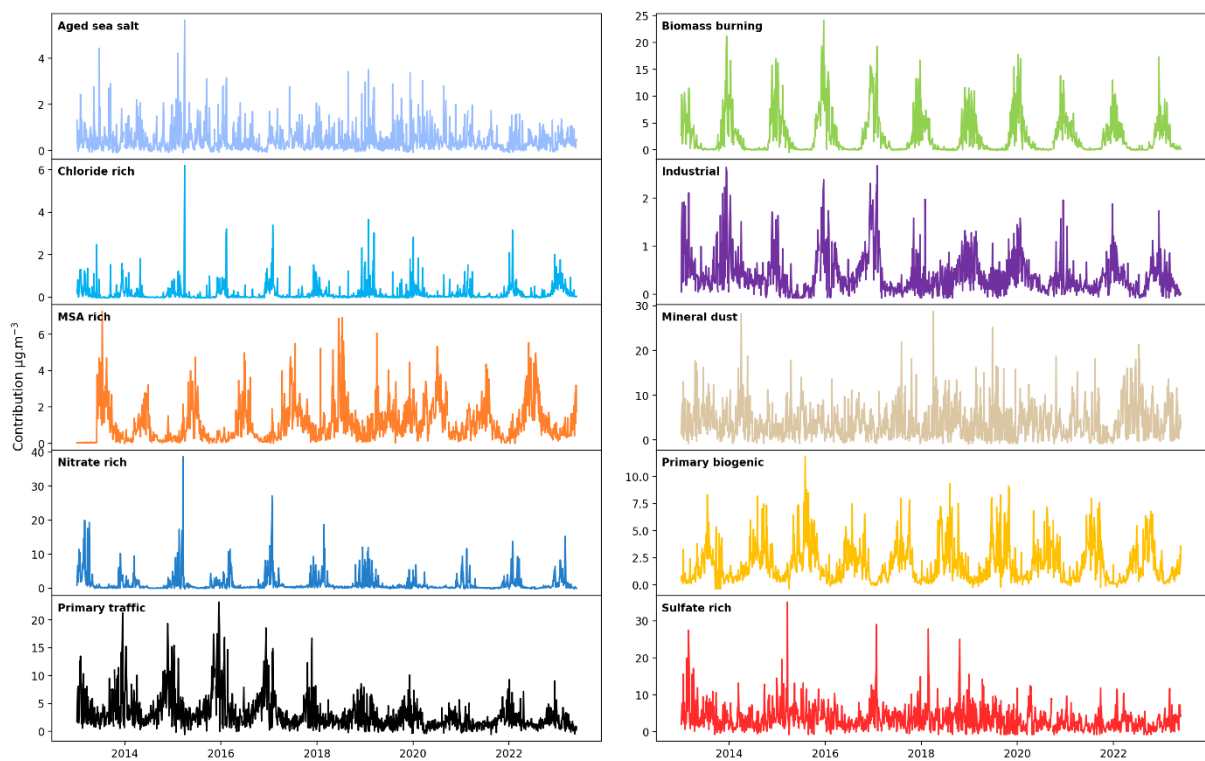

Figure S.4. Temporal evolution of PM sources, solution 11 years

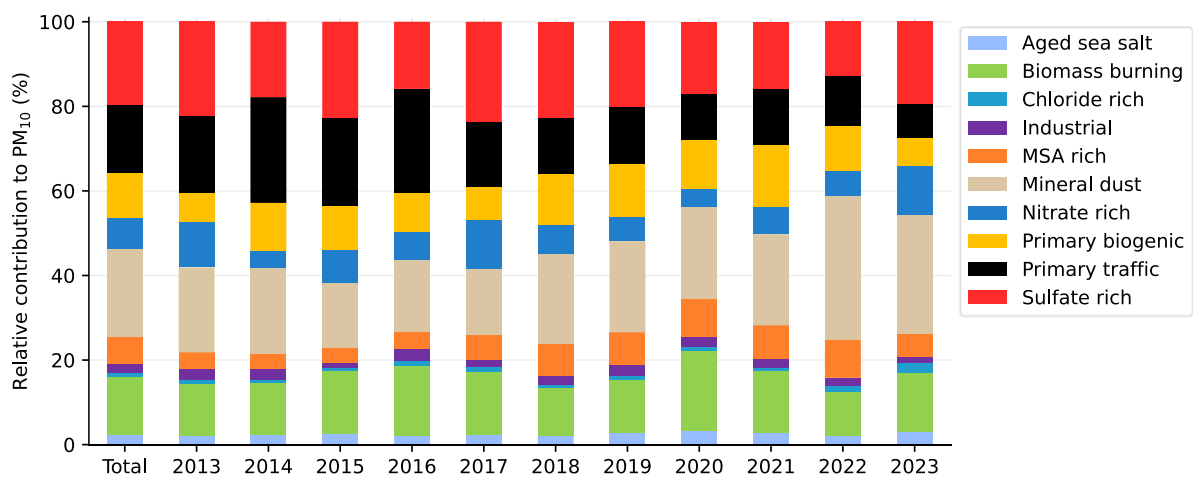

Figure S.5. The absolute average contribution of sources to PM<sub>10</sub> (%) for 11 years and every years.

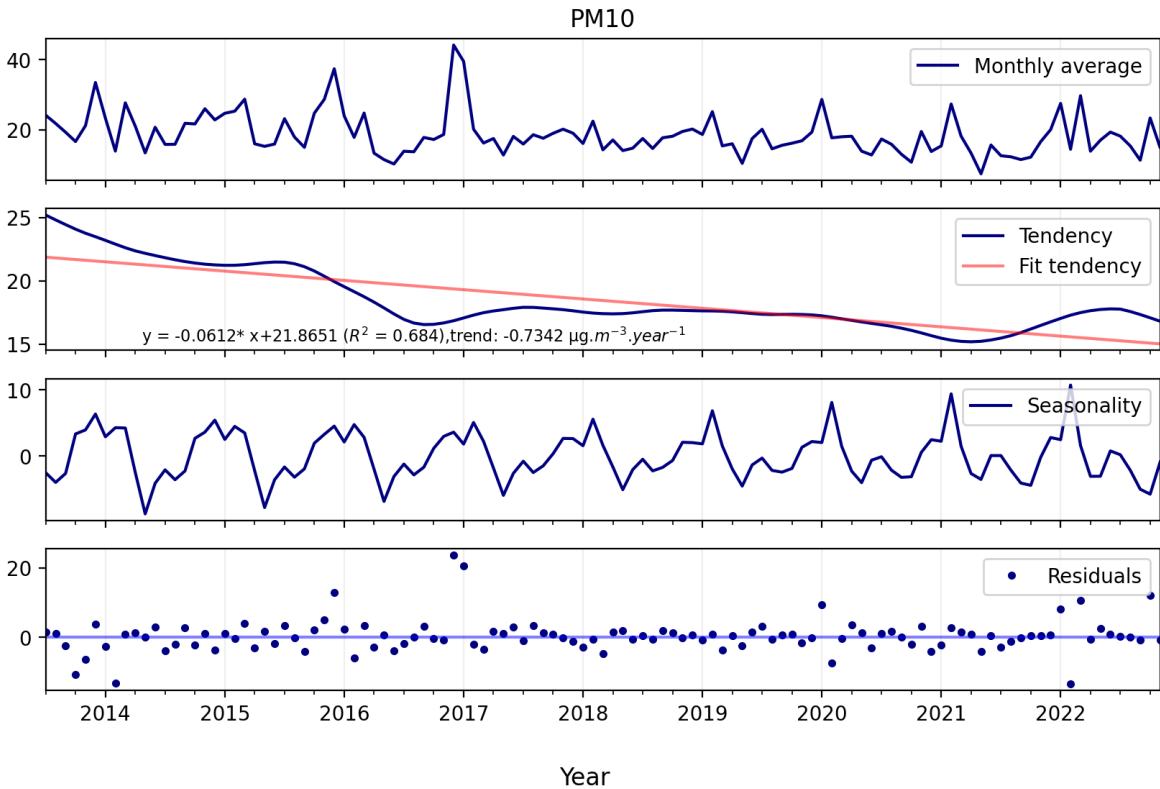

Figure S.6. STL decomposition of PM10

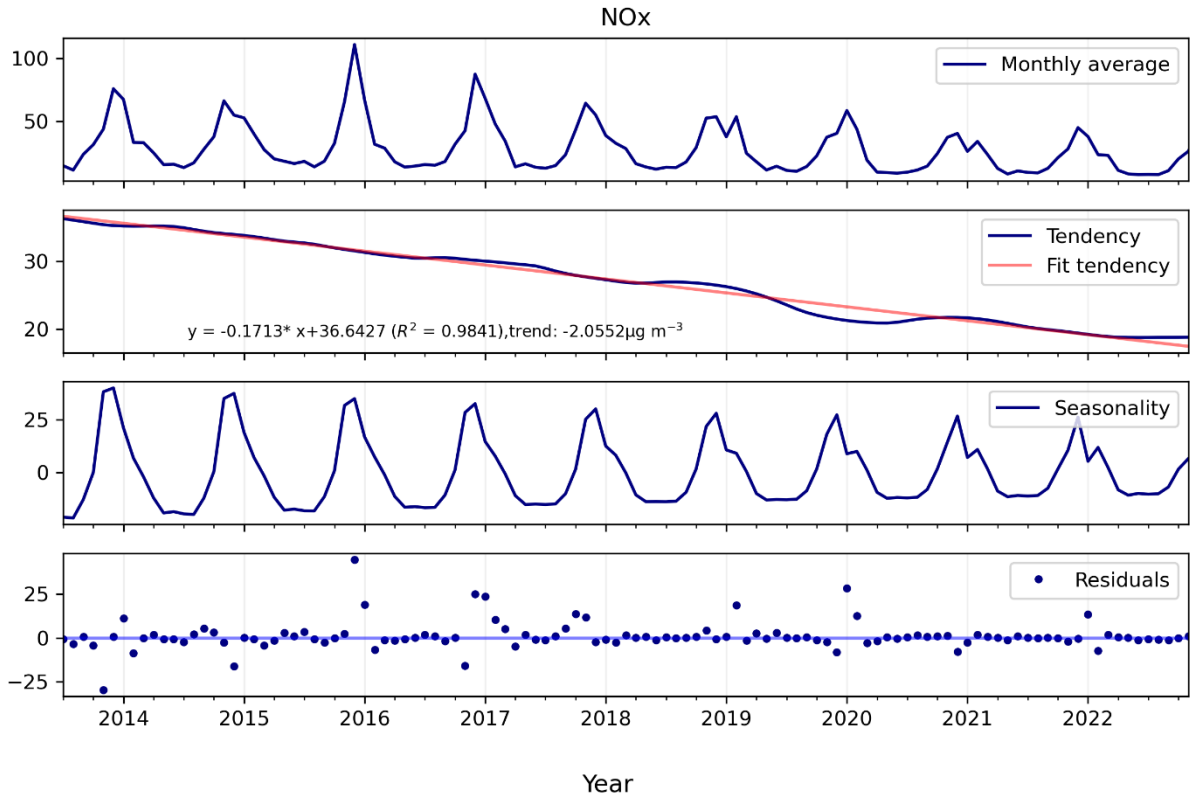

Figure S.7. STL decomposition of NOx



127

128 **S7. Thermal inversion analysis**

129 This analysis is conducted for the period Nov 2017 to May 2023, when the measurements on the mountain slopes  
130 are available. A good correlation is obtained between the PM<sub>10</sub> and bulk temperature at the city level (r reaching  
131 0.6, p<<0.001) for the winter months and it is even better when considering only the persistent inversion periods  
132 (r reaching 0.7, p<<0.001) for individual years (Table S7). Interestingly, the bivariate distribution between the  
133 daily PM<sub>10</sub> concentration and daily average  $\Delta T/\Delta z$  in winter months revealed that the majority of PM<sub>10</sub>  
134 concentration peaks (exceedances above 40  $\mu\text{g m}^{-3}$ ) are from persistent inversion (Figure S8). The distribution of  
135 the day without and with persistent inversion (Figure S9) also shows that a few high PM<sub>10</sub> concentration could be  
136 found in the days without persistent inversion, meanwhile a day with persistent inversion is not always associated  
137 to a high PM<sub>10</sub> concentration. This result is not surprising, since the concentration of PM<sub>10</sub> also depend on other  
138 meteorological conditions (precipitation, heat deficit) as well as variations in pollutant emissions (Carbone et al.,  
139 2010; Largeron and Staquet, 2016).

140

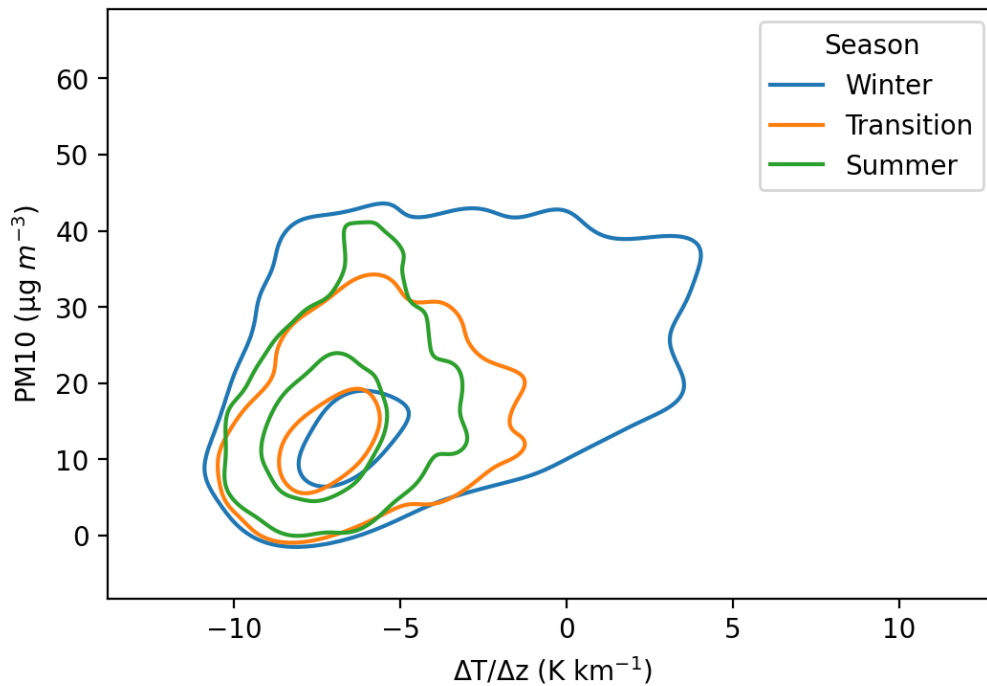

141

142 **Figure S.8. Bivariate distribution between PM10 and bulk temperature in winter (blue contour, for the month of Dec,**  
143 **Jan, Feb), summer (green contour for the month of Jun, Jul, Aug) and transition season (orange contour for the**  
144 **remaining months).**

145

146

Table S 7. Correlation between PM and bulk temperature in winter and in persistent inversion period. The star repressing the p-value. (\*\*\*: < 0.001, \*\*: < 0.01, \* < 0.05, “ns”: non-significant)

|      | R <sup>2</sup> in winter | R <sup>2</sup> in persistent inversion period |
|------|--------------------------|-----------------------------------------------|
| 2017 | 0.60**                   | 0.50**                                        |
| 2018 | 0.19*                    | 0.47**                                        |
| 2019 | 0.50***                  | 0.33**                                        |
| 2020 | 0.57***                  | 0.47***                                       |
| 2021 | 0.50***                  | 0.67**                                        |
| 2022 | 0.30***                  | 0.22*                                         |
| 2023 | 0.05 ns                  | 0.05 ns                                       |

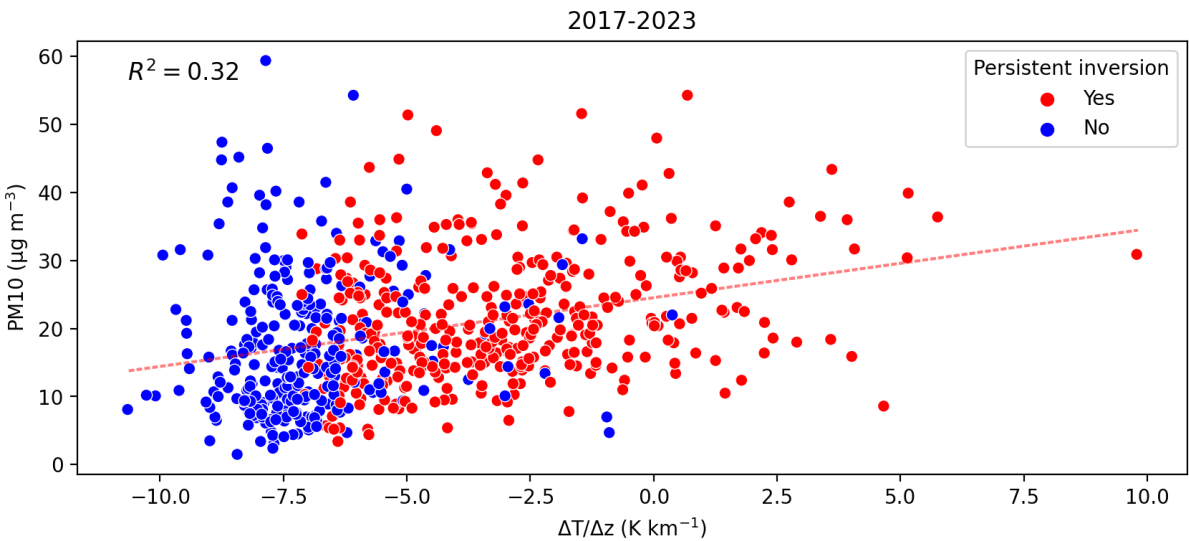

Figure S.9. Daily PM<sub>10</sub> concentration and daily average  $\Delta T/\Delta z$  in winter months (from November to March) for the period of 2017 to 2023. The red points represent the winter days when the persistent inversion is detected, and the blue points represent the other winter days.

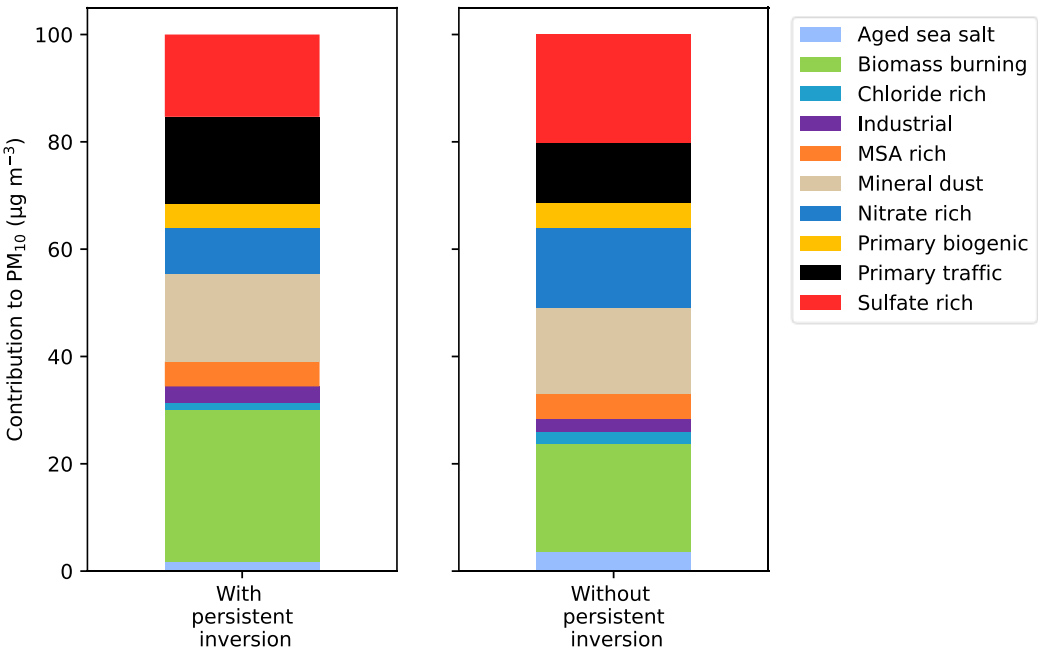

Figure S.10. Relative contribution of the different sources to PM<sub>10</sub> for days with persistent inversion vs non-inversion days of the winters 2017-2023.

Thermal inversion events were used to evaluate the relationship between biomass burning influence on  $\text{PM}_{10}$  concentration and meteorological conditions. As shown in Figure S9, more than half of the high  $\text{PM}_{10}$  concentration event is related to persistent inversion. Especially for biomass burning, which is emitted principally in winter, could be highly enlarged under the influence of inversion. Figure 7 presents the contribution of biomass burning and the bulk temperature in winter, reveals that 41% of the biomass burning contribution is explained by the temperature gradient ( $\Delta T/\Delta z$ ) between 2017 and 2023. better than considering  $\text{PM}_{10}$  ( $R^2 = 0.3$ ). In particular, the high contribution of biomass burning ( $>10 \mu\text{g m}^{-3}$ ) is always found in the episodes of persistent inversion. This demonstrates that the occurrence of persistent inversion systematically decreasing the temperature in the city enhances the use of heating as well as traps the aerosol and enlarges the contribution of biomass burning. Although the relationship between persistent inversion events and biomass burning emissions is affirmed, the reduction trend of biomass burning does not completely depend on the persistent inversion events. As shown in Figure 5, the number of persistent inversions per year is nearly similar, while the contribution of biomass burning steadily decreases over the years. The average annual biomass burning sources PMF-derived is compared to the local  $\text{PM}_{10}$  emission inventory by residential heating (tonnes), provided by the Central air quality monitoring laboratory (Atmo AuRA) to confirm the trend of biomass burning. The annual average of biomass burning is agreed with the emission inventory, demonstrating the consistency between the sources observed by the PMF model and the local inventory emission data. Since 2015, the Grenoble Metropolis has set up an air-wood bonus to encourage households to renew their individual wood-burning appliance (fireplace or stove), and aim to replace all open fireplaces with closed appliances in October 2024. The downward trend of biomass burning demonstrates the effectiveness of the region's policy in changing residential heating equipment, to improve the city's air quality.

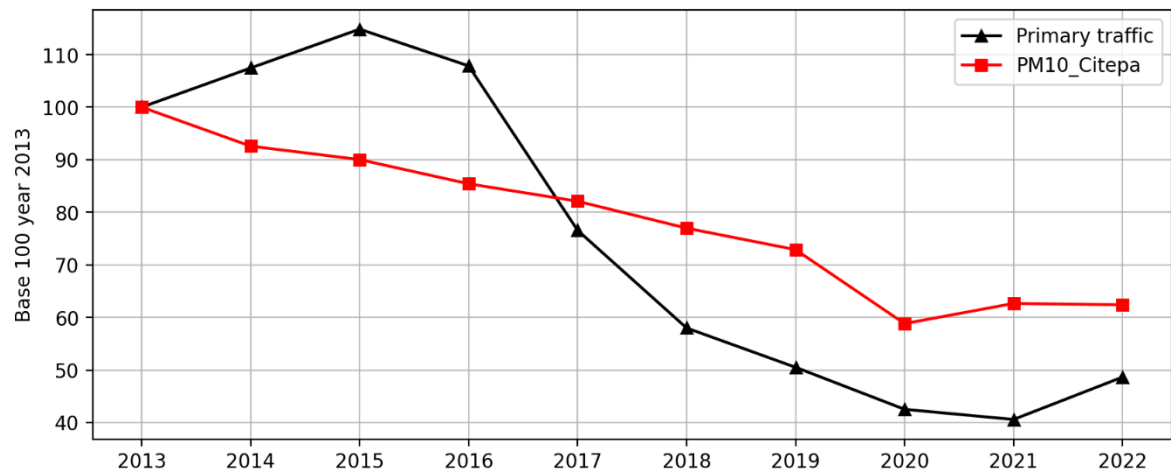

Figure S.11. Comparison of the traffic contribution and  $\text{PM}_{10}$  emission by the transport sector in France.

**S8. OP PM10 SA result**

**Table S 8. The appropriate model of OP SA**

|                    | OP <sub>AA</sub> | OP <sub>DTT</sub> |
|--------------------|------------------|-------------------|
| Heteroscedasticity | Yes              | Yes               |
| Collinearity       | No               | No                |
| The suitable model | wPLS, WLS        | wPLS, WLS         |

**Table S 9. The R<sup>2</sup>, RMSE and MAE of the suitable models**

|                | OP <sub>AA</sub> |      | OP <sub>DTT</sub> |      |
|----------------|------------------|------|-------------------|------|
|                | wPLR             | WLS  | wPLR              | WLS  |
| R <sup>2</sup> | 0.69             | 0.70 | 0.61              | 0.61 |
| RMSE           | 0.88             | 0.85 | 0.89              | 0.86 |
| MAE            | 0.49             | 0.47 | 0.63              | 0.62 |

Tendency of OP<sub>m</sub> and OP<sub>v</sub>

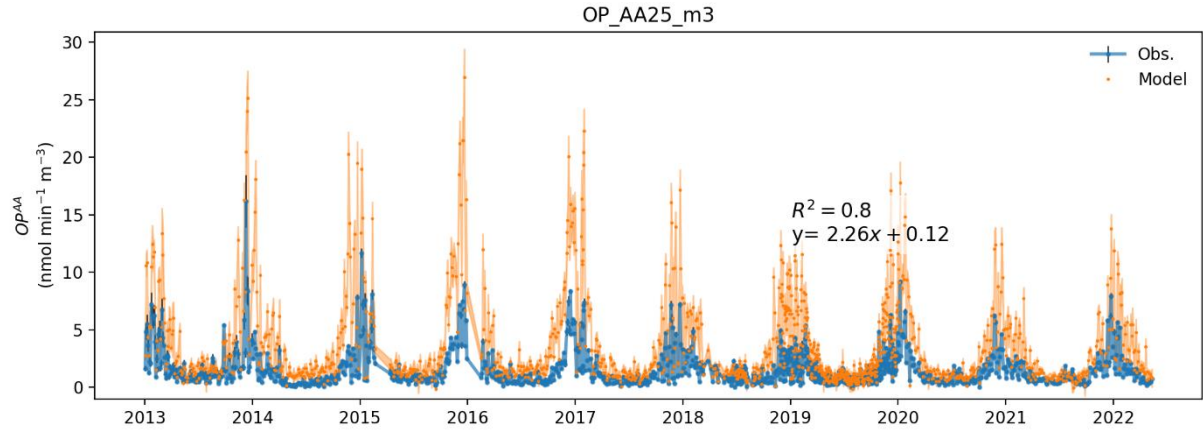

**Figure S.12. The comparison between observed OP<sub>AA</sub> and predicted OP<sub>AA</sub>**

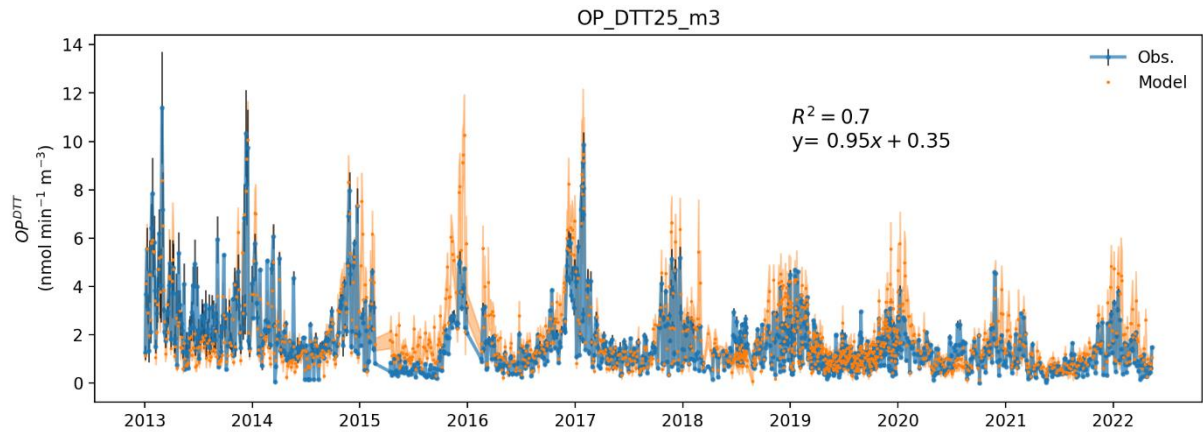

**Figure S.13. The comparison between observed OP<sub>DTT</sub> and predicted OP<sub>DTT</sub>**

**Table S 10. Accuracy metric of the testing and training dataset of Multiple layer perceptron (MLP) and Random Forest (RF)**

|                      | MLP      |         | RF       |         |
|----------------------|----------|---------|----------|---------|
|                      | Training | Testing | Training | Testing |
| <b>R<sup>2</sup></b> | 0.75     | 0.75    | 0.90     | 0.72    |
| <b>RMSE</b>          | 0.67     | 0.74    | 0.32     | 0.79    |
| <b>MAE</b>           | 0.36     | 0.39    | 0.17     | 0.41    |

**Table S 11. Intrinsic OP<sub>AA</sub> and intrinsic OP<sub>DTT</sub> description**

| OPtype     | Source           | count | mean  | std  | min   | 25%   | 50%   | 75%   | max  | IQR  |
|------------|------------------|-------|-------|------|-------|-------|-------|-------|------|------|
| <b>AA</b>  | Aged sea salt    | 500   | -0.02 | 0.07 | -0.23 | -0.06 | -0.03 | 0.00  | 0.19 | 0.06 |
|            | Biomass burning  | 500   | 0.76  | 0.13 | 0.48  | 0.67  | 0.74  | 0.82  | 1.22 | 0.15 |
|            | Chloride rich    | 500   | -0.07 | 0.09 | -0.32 | -0.09 | -0.05 | -0.02 | 0.18 | 0.07 |
|            | Industrial       | 500   | 0.48  | 0.14 | -0.04 | 0.44  | 0.52  | 0.57  | 0.74 | 0.12 |
|            | MSA rich         | 500   | 0.20  | 0.04 | 0.03  | 0.18  | 0.20  | 0.23  | 0.30 | 0.05 |
|            | Mineral dust     | 500   | -0.03 | 0.06 | -0.17 | -0.07 | -0.04 | 0.01  | 0.19 | 0.07 |
|            | Nitrate rich     | 500   | 0.09  | 0.16 | -0.43 | 0.00  | 0.13  | 0.20  | 0.51 | 0.20 |
|            | Primary biogenic | 500   | 0.00  | 0.04 | -0.11 | -0.02 | 0.00  | 0.03  | 0.10 | 0.05 |
|            | Primary traffic  | 500   | 0.38  | 0.10 | 0.02  | 0.32  | 0.38  | 0.46  | 0.67 | 0.14 |
|            | Sulfate rich     | 500   | -0.01 | 0.08 | -0.22 | -0.05 | -0.02 | 0.04  | 0.23 | 0.09 |
| <b>DTT</b> | Aged sea salt    | 500   | 0.03  | 0.02 | 0.00  | 0.02  | 0.03  | 0.05  | 0.13 | 0.02 |
|            | Biomass burning  | 500   | 0.14  | 0.09 | 0.00  | 0.08  | 0.13  | 0.17  | 0.45 | 0.09 |
|            | Chloride rich    | 500   | 0.01  | 0.02 | 0.00  | 0.00  | 0.00  | 0.00  | 0.12 | 0.00 |
|            | Industrial       | 500   | 0.52  | 0.08 | 0.31  | 0.47  | 0.51  | 0.55  | 0.86 | 0.08 |
|            | MSA rich         | 500   | 0.01  | 0.02 | 0.00  | 0.00  | 0.00  | 0.02  | 0.13 | 0.02 |
|            | Mineral dust     | 500   | 0.01  | 0.02 | 0.00  | 0.00  | 0.00  | 0.00  | 0.17 | 0.00 |
|            | Nitrate rich     | 500   | 0.11  | 0.12 | 0.00  | 0.02  | 0.07  | 0.12  | 0.50 | 0.10 |
|            | Primary biogenic | 500   | 0.02  | 0.03 | 0.00  | 0.00  | 0.01  | 0.02  | 0.12 | 0.02 |
|            | Primary traffic  | 500   | 0.24  | 0.07 | 0.06  | 0.20  | 0.24  | 0.28  | 0.48 | 0.08 |
|            | Sulfate rich     | 500   | 0.09  | 0.04 | 0.00  | 0.06  | 0.08  | 0.11  | 0.22 | 0.05 |

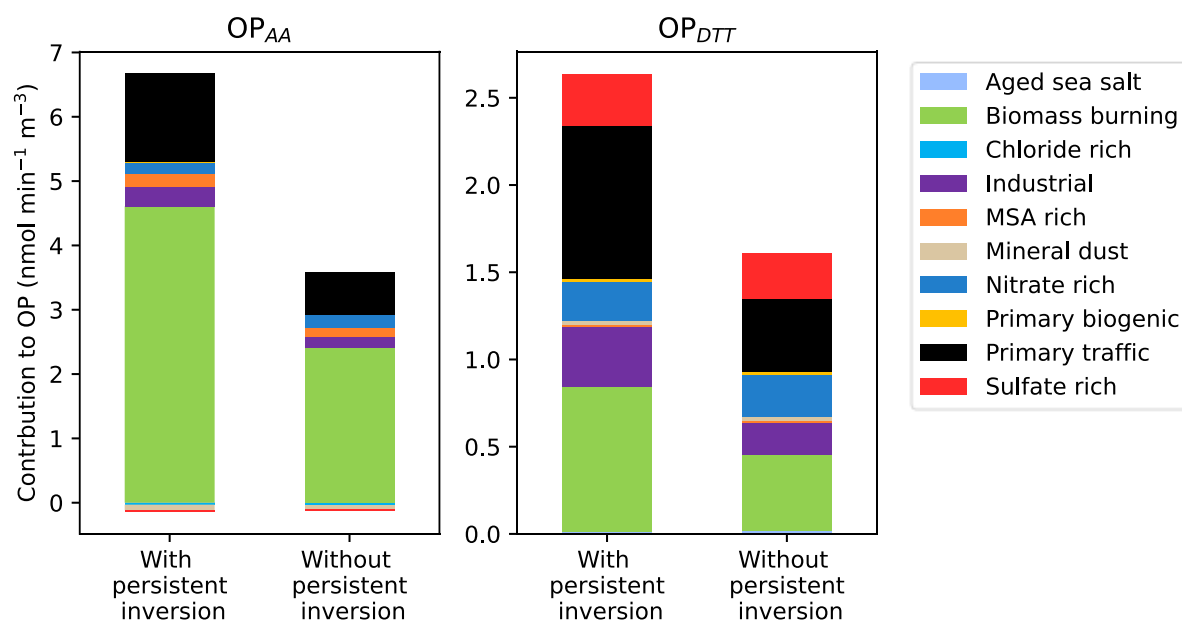

**Figure S.14.** Contribution of the different sources to  $OP_{AA}$  (left) and  $OP_{DTT}$  (right), for days with persistent inversion vs non-inversion days of the winters 2017-2023.

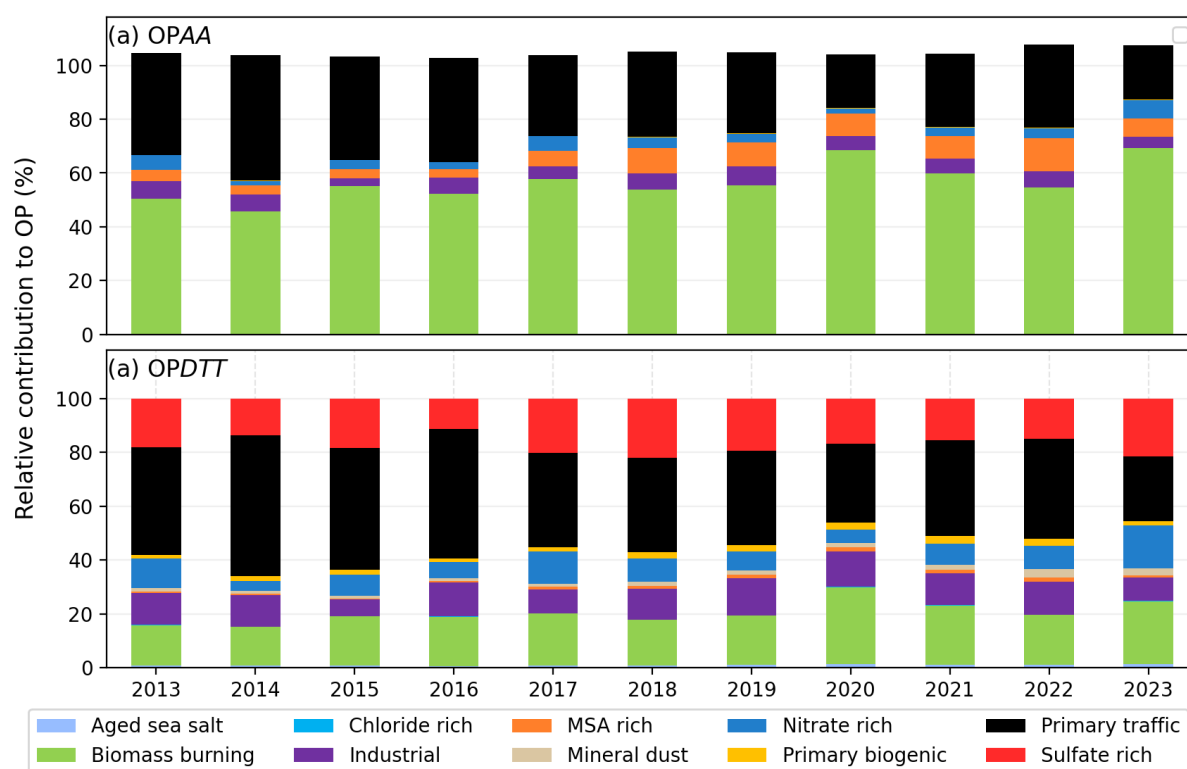

**Figure S.15.** Yearly average relative contribution of sources to (a)  $OP_{AA}$  and (b)  $OP_{DTT}$ .

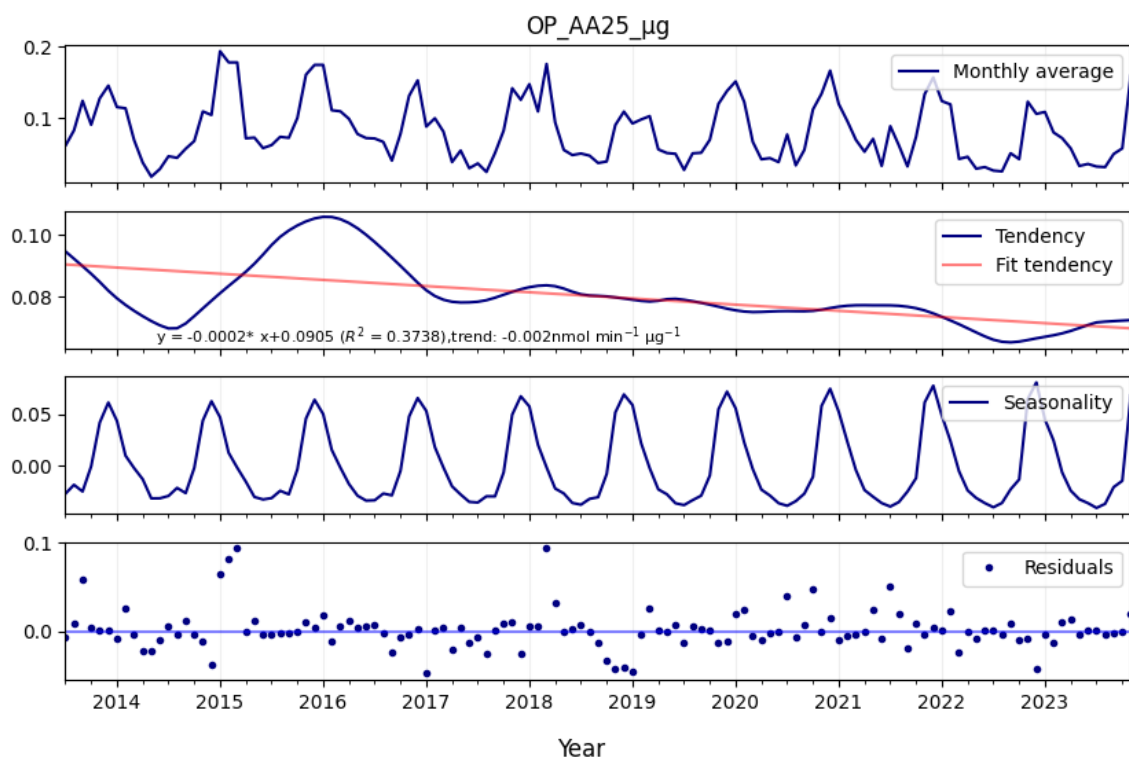

Figure S.16. STL decomposition of OP<sub>AA</sub><sup>m</sup>

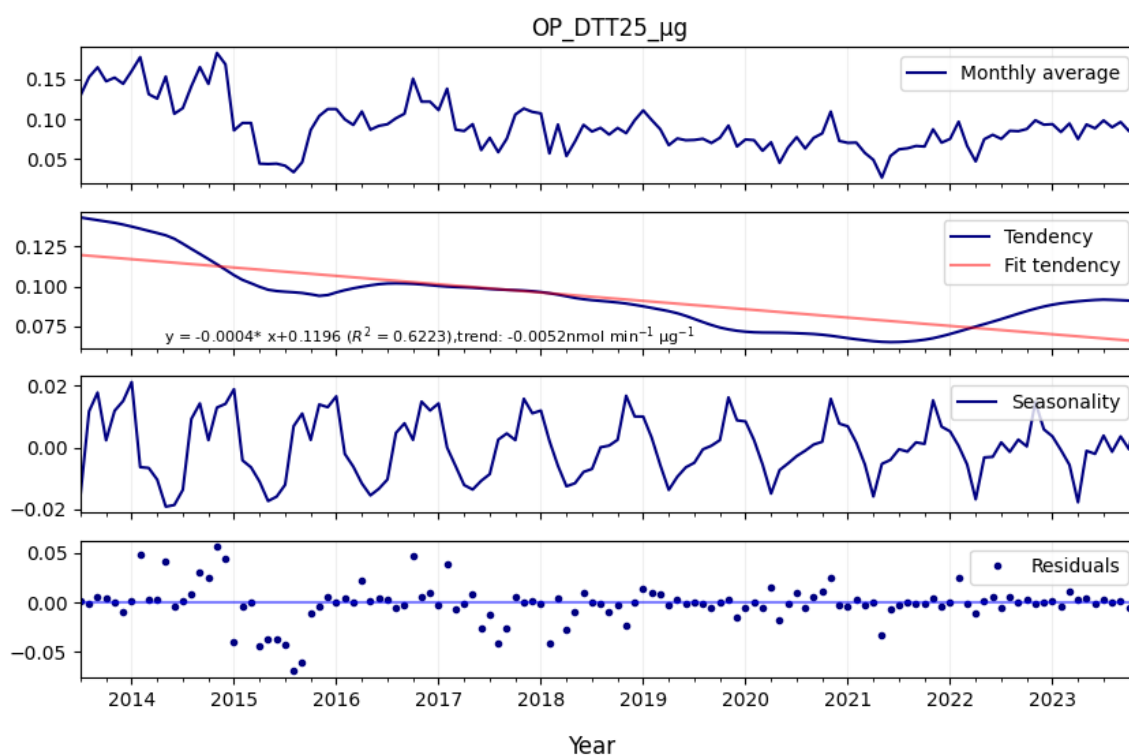

Figure S.17. STL decomposition of OP<sub>DTT</sub><sup>m</sup>

## 212    **References**

- 213    Alexander, B., Park, R. J., Jacob, D. J., Li, Q. B., Yantosca, R. M., Savarino, J., Lee, C. C. W., and Thiemens, M.  
214    H.: Sulfate formation in sea-salt aerosols: Constraints from oxygen isotopes, *J. Geophys. Res. Atmospheres*, 110,  
215    2004JD005659, <https://doi.org/10.1029/2004JD005659>, 2005.
- 216    Azur, M. J., Stuart, E. A., Frangakis, C., and Leaf, P. J.: Multiple imputation by chained equations: what is it and  
217    how does it work?, *Int. J. Methods Psychiatr. Res.*, 20, 40–49, <https://doi.org/10.1002/mpr.329>, 2011.
- 218    Belis, C. A., Favez, O., Harrison, R. M., Larsen, B. R., Amato, F., El Haddad, I., Hopke, P. K., Nava, S., Paatero,  
219    P., Prévôt, A., Quass, U., Vecchi, R., Viana, M., and European Commission (Eds.): European guide on air pollution  
220    source apportionment with receptor models, Publications Office, Luxembourg, 1 pp.,  
221    <https://doi.org/10.2788/9332>, 2014.
- 222    Carbone, C., Decesari, S., Mircea, M., Giulianelli, L., Finessi, E., Rinaldi, M., Fuzzi, S., Marinoni, A., Duchi, R.,  
223    Perrino, C., Sargolini, T., Vardè, M., Sprovieri, F., Gobbi, G. P., Angelini, F., and Facchini, M. C.: Size-resolved  
224    aerosol chemical composition over the Italian Peninsula during typical summer and winter conditions, *Atmos.*  
225    *Environ.*, 44, 5269–5278, <https://doi.org/10.1016/j.atmosenv.2010.08.008>, 2010.
- 226    Favez, O., El Haddad, I., Piot, C., Boréave, A., Abidi, E., Marchand, N., Jaffrezo, J. L., Besombes, J. L., Personnaz,  
227    M. B., Sciare, J., Wortham, H., George, C., and D’Anna, B.: Inter-comparison of source apportionment models  
228    for the estimation of wood burning aerosols during wintertime in an Alpine city (Grenoble, France), *Atmospheric*  
229    *Chem. Phys.*, 10, 5295–5314, <https://doi.org/10.5194/acp-10-5295-2010>, 2010.
- 230    Largeron, Y. and Staquet, C.: Persistent inversion dynamics and wintertime PM10 air pollution in Alpine valleys,  
231    *Atmos. Environ.*, 135, 92–108, <https://doi.org/10.1016/j.atmosenv.2016.03.045>, 2016.
- 232    Ocepek, U., Rugelj, J., and Bosnić, Z.: Improving matrix factorization recommendations for examples in cold start,  
233    *Expert Syst. Appl.*, 42, 6784–6794, <https://doi.org/10.1016/j.eswa.2015.04.071>, 2015.
- 234    Pedregosa, F., Varoquaux, G., Gramfort, A., Michel, V., Thirion, B., Grisel, O., Blondel, M., Prettenhofer, P.,  
235    Weiss, R., Dubourg, V., Vanderplas, J., Passos, A., Cournapeau, D., Brucher, M., Perrot, M., and Duchesnay, E.:  
236    Scikit-learn: Machine Learning in {P}ython, *J. Mach. Learn. Res.*, 12, 2825–2830, 2011.
- 237    Putaud, J.-P., Raes, F., Van Dingenen, R., Brüggemann, E., Facchini, M.-C., Decesari, S., Fuzzi, S., Gehrig, R.,  
238    Hüglin, C., Laj, P., Lorbeer, G., Maenhaut, W., Mihalopoulos, N., Müller, K., Querol, X., Rodriguez, S., Schneider,  
239    J., Spindler, G., Brink, H. T., Tørseth, K., and Wiedensohler, A.: A European aerosol phenomenology—2:  
240    chemical characteristics of particulate matter at kerbside, urban, rural and background sites in Europe, *Atmos.*  
241    *Environ.*, 38, 2579–2595, <https://doi.org/10.1016/j.atmosenv.2004.01.041>, 2004.
- 242    Putaud, J.-P., Van Dingenen, R., Alastuey, A., Bauer, H., Birmili, W., Cyrys, J., Flentje, H., Fuzzi, S., Gehrig, R.,  
243    Hansson, H. C., Harrison, R. M., Herrmann, H., Hitztenberger, R., Hüglin, C., Jones, A. M., Kasper-Giebl, A.,  
244    Kiss, G., Kousa, A., Kuhlbusch, T. A. J., Löschau, G., Maenhaut, W., Molnar, A., Moreno, T., Pekkanen, J.,  
245    Perrino, C., Pitz, M., Puxbaum, H., Querol, X., Rodriguez, S., Salma, I., Schwarz, J., Smolik, J., Schneider, J.,  
246    Spindler, G., Ten Brink, H., Tursic, J., Viana, M., Wiedensohler, A., and Raes, F.: A European aerosol  
247    phenomenology – 3: Physical and chemical characteristics of particulate matter from 60 rural, urban, and kerbside  
248    sites across Europe, *Atmos. Environ.*, 44, 1308–1320, <https://doi.org/10.1016/j.atmosenv.2009.12.011>, 2010.
- 249    Salameh, D., Detournay, A., Pey, J., Pérez, N., Liguori, F., Saraga, D., Bove, M. C., Brotto, P., Cassola, F.,  
250    Massabò, D., Latella, A., Pillon, S., Formenton, G., Patti, S., Armengaud, A., Piga, D., Jaffrezo, J. L., Bartzis, J.,  
251    Tolis, E., Prati, P., Querol, X., Wortham, H., and Marchand, N.: PM2.5 chemical composition in five European  
252    Mediterranean cities: A 1-year study, *Atmospheric Res.*, 155, 102–117,  
253    <https://doi.org/10.1016/j.atmosres.2014.12.001>, 2015.
